# Supplementary material
Source: PubMed Central journal article supplement (PMC8307379)
Supplement: pnas.2105550118.sapp.pdf [file pnas.2105550118.sapp.pdf]

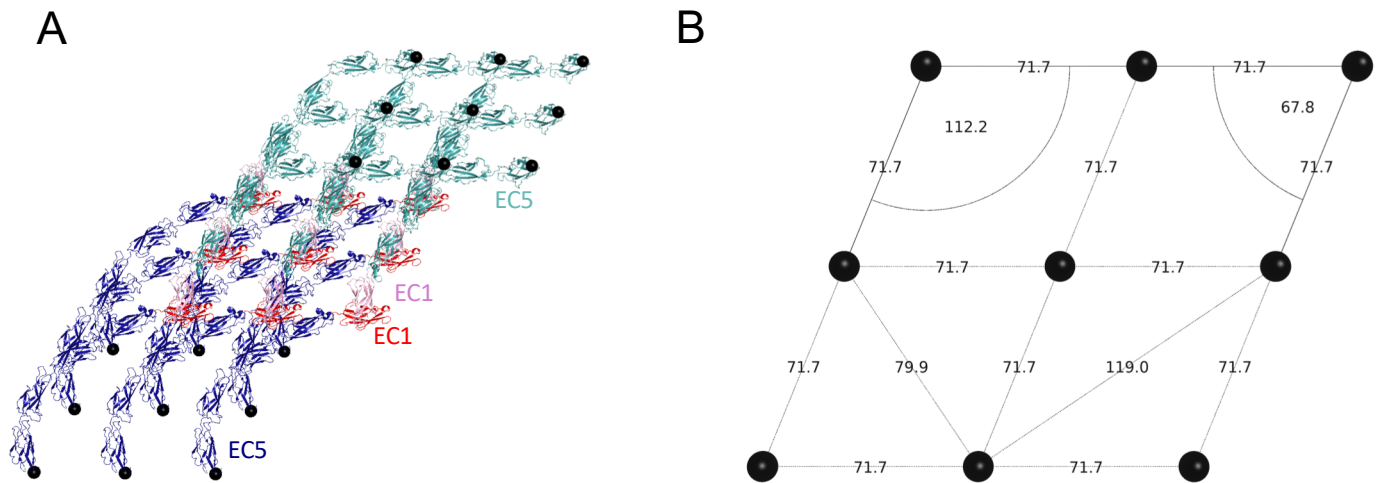

### Figure S1

**Extracellular cadherin lattice imposes constraints on cytoplasmic components.** **(A)** 3x3 lattice formed by *cis*- and *trans*- interactions of E-cadherin ectodomains (blue or cyan) in ribbon representation. EC1 domains that interact in *trans* are highlighted in red or pink. The N-terminal (EC1) and the C-terminal (EC5) extracellular domains are marked for one cadherin *trans*-dimer. Ca atoms at the C-terminal of EC5 domains are shown as black dots. **(B)** Distances (in Å) and angles (in °) between Ca atoms denoted as dots define spatial constraints imposed by cadherin *cis*- and *trans*- interactions on cytoplasmic components.

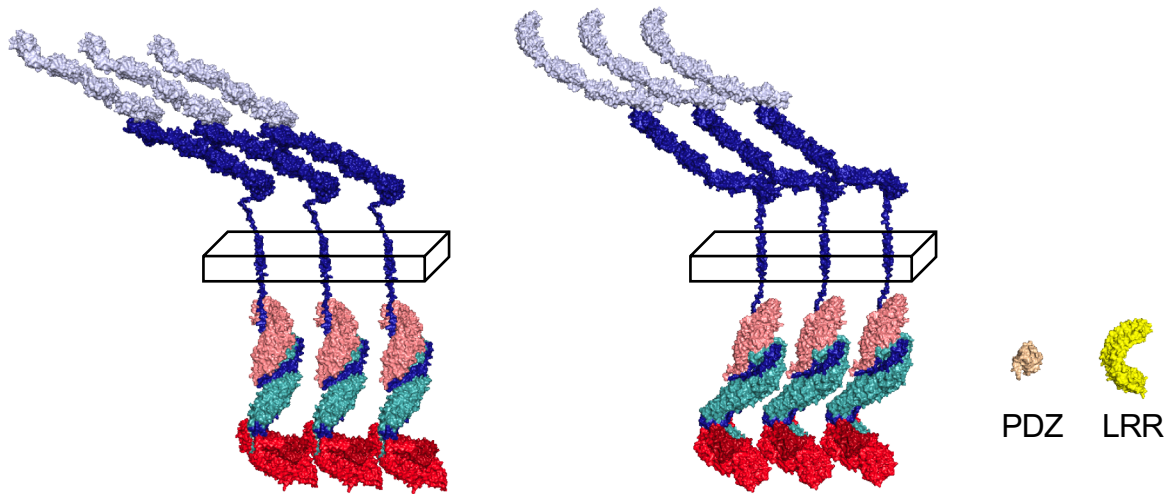

### Figure S2

**Visual size comparison of erbin and scribble protein domains with lattice spacings.** Two 3x1 lattices along two distinct dimensions of the 3x3 lattice in Fig. 4 are shown alongside PDZ and LRR domains, all in surface representations and arranged at the same distance to the observer to demonstrate relative sizes of the proteins with respect to the lattice spacings. A PDZ domain (orange, PDBID 5VWC) would barely fit into the lattice, while LRR domain (yellow, PDBID 4U09) would not fit. All other notations and colors as in Fig. 4.

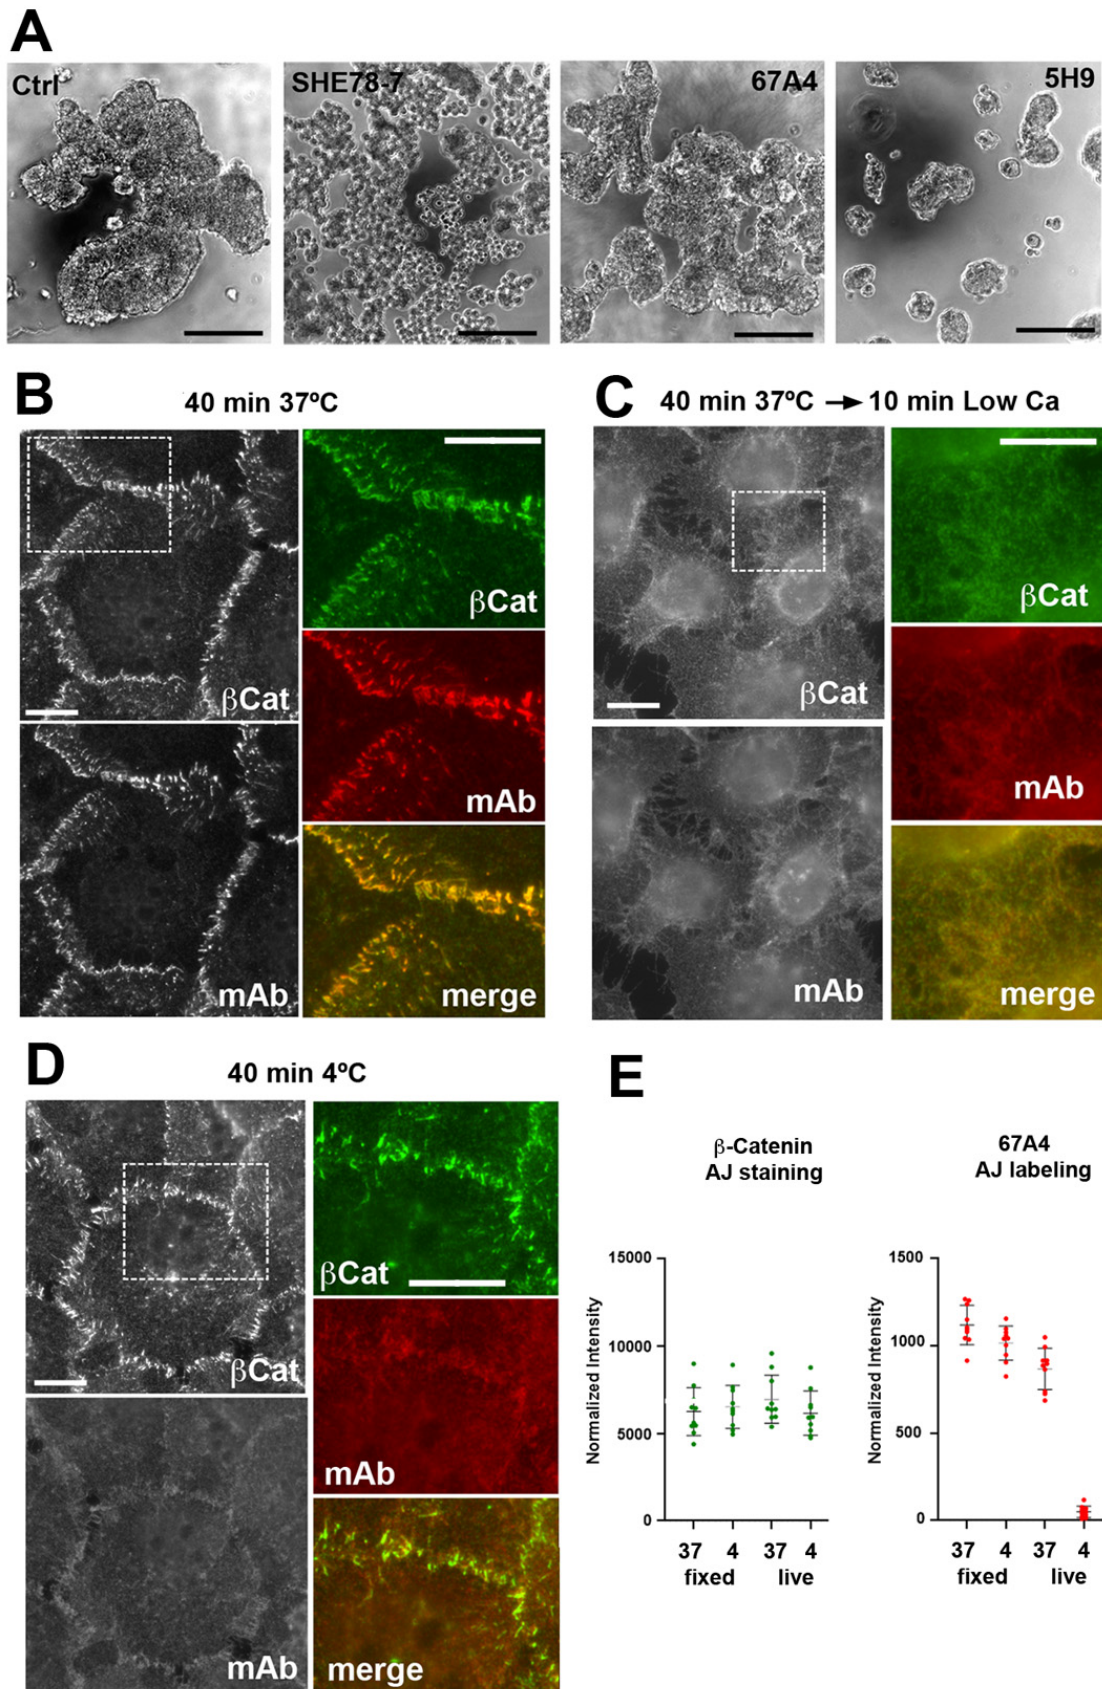

**Figure S3**

mAbs 67A4 and 5H9 do not block cadherin adhesion. See full caption on the next page

### Figure S3

**mAbs 67A4 and 5H9 do not block cadherin adhesion.** (A) Hanging drop assay with A431 cells in standard media (Ctrl), in the presence of adhesion-blocking SHE78-7 (SHE78-7) or adhesion-neutral 67A4 (67A4) or 5H9 (5H9) mAbs. Note that the “neutral” mAbs failed to inhibit formation of compact cell aggregates. Bars, 0.5  $\mu\text{m}$ . (B) Immunofluorescence microscopy of A431 cells cultured for 40 min with 67A4 mAb at 37  $^{\circ}\text{C}$ . Cells were then stained with rabbit  $\beta$ -catenin antibody to reveal AJs ( $\beta$ Cat) and with mouse IgG antibody to detect 67A4-bound E-cadherin (mAb). Bar, 10  $\mu\text{m}$ . (C) The parallel cell culture, after 40 min with the mAb as in B, was incubated for additional 10 min with 67A4 mAb in low calcium media. Complete dissolution of mAb-bound AJs indicates that the mAb does not cross-link cadherin through adjacent cells. Bar, 10  $\mu\text{m}$ . (D) The same experiment as in B but performed at 4 $^{\circ}\text{C}$ . Note that AJs remain unlabeled in metabolically inactive cells. The dash line boxed regions (B-D) are magnified on the right of each panel. To show the distribution of mAb on the cell surface, the exposure time for mAb staining in D was twice longer than that in B and C. Bar, 10  $\mu\text{m}$ . (E) Quantification of the 67A4 mAb incorporation into AJs at 4 $^{\circ}\text{C}$  and 37 $^{\circ}\text{C}$  in fixed and live cells. Fixed and permeabilized A431 cells (fixed) were stained with rabbit  $\beta$ -catenin antibody ( $\beta$ -catenin AJ staining) or with mouse 67A4 mAb (67A4 AJ labeling) at 4 $^{\circ}\text{C}$  or 37 $^{\circ}\text{C}$  and then stained with the corresponding secondary antibodies at RT. Live cells (live) were cultured for 40 min with the mAb before fixation, and then stained for  $\beta$ -catenin and for the mouse IgG. Note, the staining of AJs in fixed cells is temperature-independent. In live cells, by contrast, the mAb incorporates into AJs only at 37 $^{\circ}\text{C}$ .



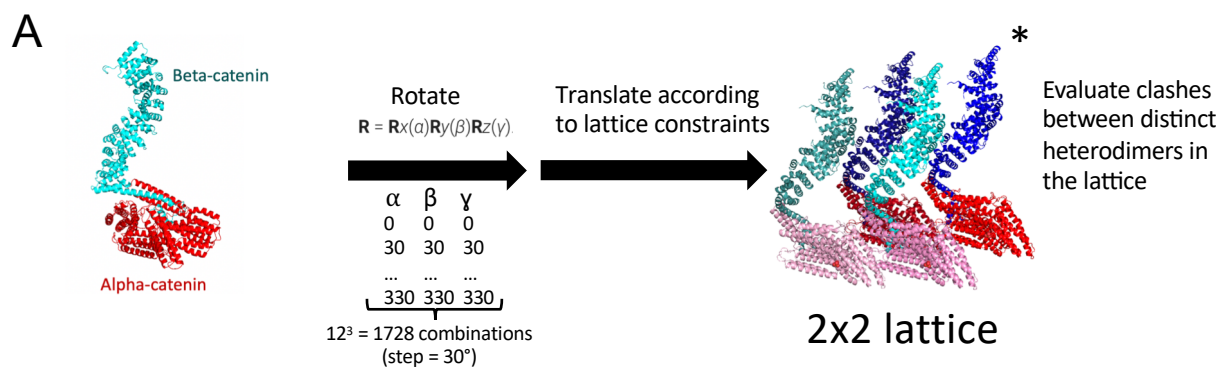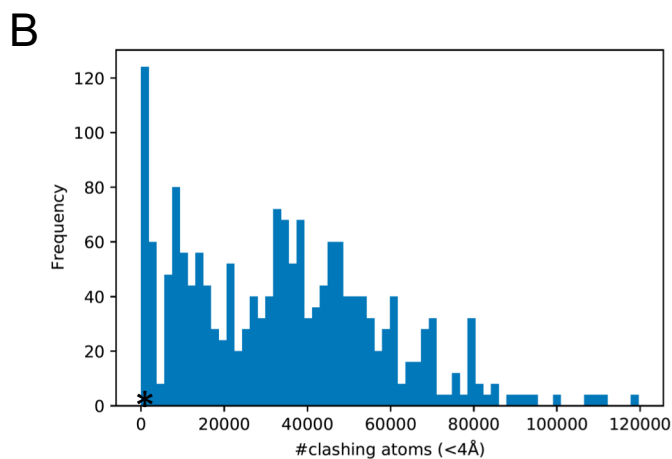

- C**
- atom NH1 (ARG137, chain A) clashes with atom NZ (LYS577, chain C),  $d = 3.9 \text{ \AA}$
  - atom NH1 (ARG137, chain B) clashes with atom NZ (LYS577, chain D),  $d = 3.9 \text{ \AA}$
  - atom NZ (LYS577, chain C) clashes with atom NH1 (ARG137, chain A),  $d = 3.9 \text{ \AA}$
  - atom NZ (LYS577, chain D) clashes with atom NH1 (ARG137, chain B),  $d = 3.9 \text{ \AA}$

### Figure S5

**Finding orientation of a full-length  $\alpha$ -catenin/ $\beta$ -catenin with no clashes in the lattice.** (A) Model of full-length  $\alpha$ -catenin/ $\beta$ -catenin heterodimer built from crystal structure fragments in ribbon representation followed by a flow chart to generate 2x2 lattices using rotations by different Euler angle combinations and subsequent evaluation of clashes. (B) Distribution of clashes found in 1728 2x2 lattices. (C) List of closest atoms in the lattice with minimal number of clashes. This lattice, denoted with asterisk, was used in the final model.

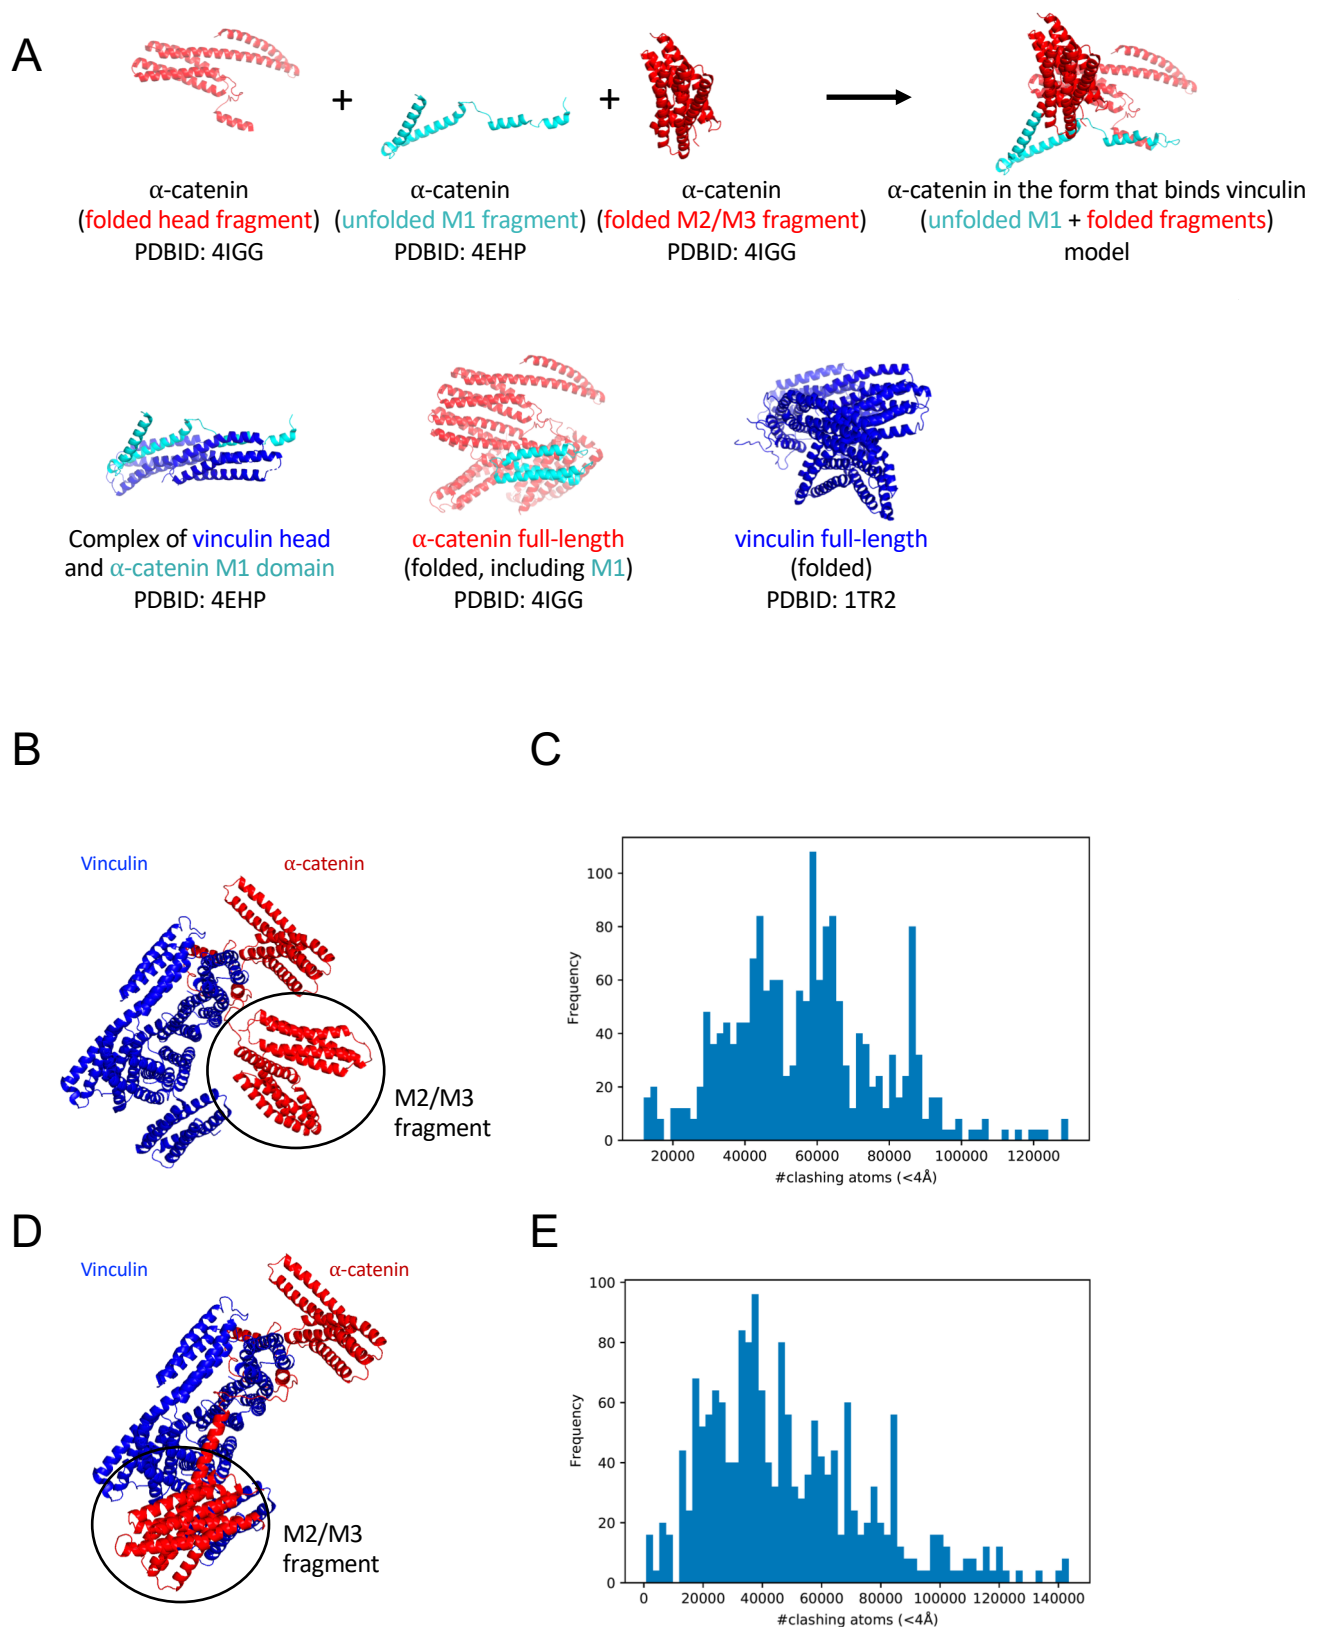

**Figure S6**

**Vinculin is unlikely to form an interspersed lattice with  $\alpha$ -catenin in E-clusters.** (A) Model of  $\alpha$ -catenin in the form to bind vinculin and crystal structure fragments (with PDBIDs given in parenthesis) used to build the model, all in ribbon representation. Head domain of full-length  $\alpha$ -catenin was stitched to an unfurled M1-domain of  $\alpha$ -catenin from the complex with vinculin, and further to the M2/M3 fragment of full-length  $\alpha$ -catenin (top panel). The reference crystal structures used to build the model are shown in the bottom panel. (B)  $\alpha$ -catenin/vinculin heterodimer model in ribbon representation obtained by merging full-length vinculin structure and  $\alpha$ -catenin in the form to bind vinculin from (A). (C) Distribution of clashes found in 1728 2x2 lattices built by rotating the heterodimer in (B) by different combinations of Euler angles (from  $\alpha, \beta, \gamma = 0^\circ$  to  $\alpha, \beta, \gamma = 330^\circ$  with a stepsize of  $30^\circ$ ). (D) same as B but with reoriented M2/M3 fragment - a more compact model. (E) Distribution of clashes found in 1728 2x2 lattices built by rotating heterodimer in (D).

A

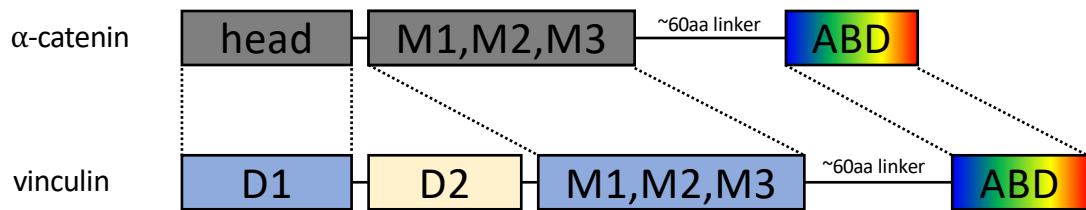

B

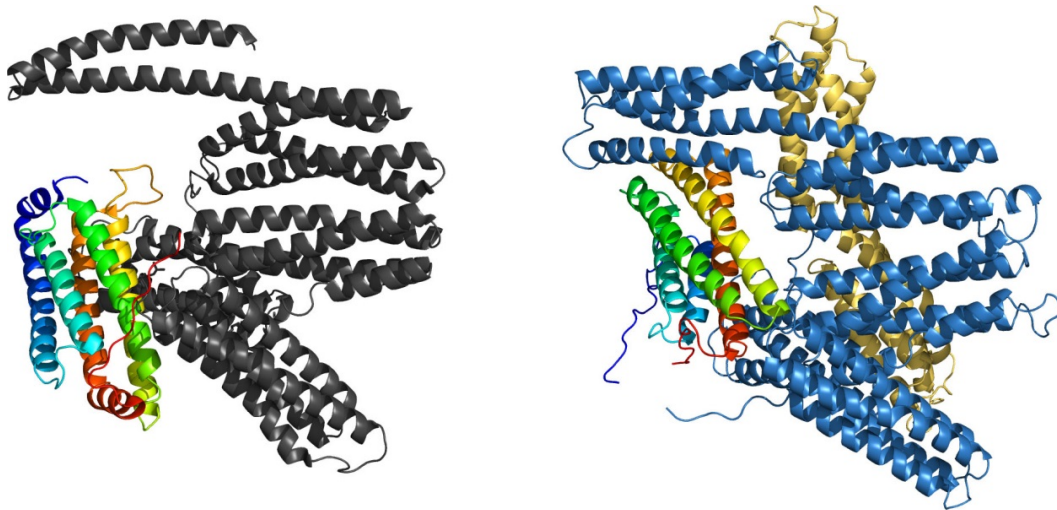

### Figure S7

**Structural similarity of  $\alpha$ -catenin and vinculin.** (A) Schematic representation and similarities of domain composition between  $\alpha$ -catenin and vinculin. Structurally similar domains are connected by dotted lines. Both proteins can bind actin via ABD (rainbow), which is connected via long and flexible linker to M domain. Vinculin has an extra domain, D2 in yellow, not present in  $\alpha$ -catenin. (B) Ribbon representation of aligned full-length  $\alpha$ -catenin (PDBID: 4IGG) and vinculin (PDBID: 1TR2) structures. Color code of protein domains as in (A).



| #  | Gene     | Protein name                                                               | Mean protein spectra counts for cells: |          |         |         |            | Statistics for EcGFP |            |
|----|----------|----------------------------------------------------------------------------|----------------------------------------|----------|---------|---------|------------|----------------------|------------|
|    |          |                                                                            | EcGFP                                  | WK-EcGFP | αCat-KO | p120-KO | Pg/βCat-KO | stand dev            | p value    |
| 1  | CTNNA1   | Catenin Alpha 1                                                            | 390                                    | 388      | 0       | 313     | 0          | 39.42805383          | 0.00000010 |
| 2  | CTNNA1   | Catenin Beta 1                                                             | 372                                    | 315      | 305     | 184     | 0          | 98.23441352          | 0.00002865 |
| 3  | CTNND1   | Catenin Delta 1                                                            | 244                                    | 235      | 232     | 0       | 61         | 28.91201760          | 0.00000026 |
| 4  | JUP      | Plakoglobin                                                                | 239                                    | 343      | 276     | 210     | 0          | 136.91359806         | 0.00181053 |
| 5  | CDH1     | E-Cadherin                                                                 | 151                                    | 245      | 410     | 181     | 287        | 51.13000000          | 0.00018769 |
| 6  | TLN1     | Talin 1                                                                    | 127                                    | 136      | 94      | 35      | 3          | 27.78403104          | 0.00000952 |
| 7  | ITGB4    | Integrin Subunit Beta 4                                                    | 61                                     | 82       | 67      | 30      | 1          | 12.30756639          | 0.00000598 |
| 8  | ANK3     | Ankyrin 3                                                                  | 58                                     | 35       | 39      | 0       | 0          | 13.91470616          | 0.00001725 |
| 9  | MYO1C    | Myosin IC                                                                  | 49                                     | 59       | 31      | 5       | 0          | 9.87782509           | 0.00000583 |
| 10 | PKP4     | Plakophilin 4                                                              | 49                                     | 52       | 51      | 76      | 9          | 18.07260489          | 0.00017676 |
| 11 | ARVCF    | ARVCF Delta Catenin Family Member                                          | 48                                     | 48       | 65      | 61      | 45         | 18.59979519          | 0.00023093 |
| 12 | SCRIB    | Scribble                                                                   | 41                                     | 46       | 9       | 27      | 6          | 11.88436348          | 0.00005057 |
| 13 | PLEKHA5  | Pleckstrin Homology Domain Containing A5                                   | 41                                     | 31       | 25      | 8       | 0          | 15.69349274          | 0.00024000 |
| 14 | CDH3     | P-Cadherin                                                                 | 34                                     | 0        | 22      | 8       | 14         | 11.20799035          | 0.00009320 |
| 15 | ITGA6    | Integrin Subunit Alpha 6                                                   | 30                                     | 31       | 26      | 11      | 0          | 9.29925752           | 0.00007282 |
| 16 | GNAI3    | G Protein Subunit Alpha I3                                                 | 26                                     | 30       | 22      | 12      | 8          | 5.53774924           | 0.00000831 |
| 17 | PTPRF    | Protein Tyrosine Phosphatase Receptor Type F                               | 26                                     | 33       | 22      | 4       | 0          | 12.15181742          | 0.00006529 |
| 18 | ERBIN    | ErbB2 Interacting Protein (erbin)                                          | 23                                     | 19       | 19      | 11      | 0          | 8.36660027           | 0.00017189 |
| 19 | YWHAH    | Tyrosine 3-Monooxygenase/Tryptophan 5-Monooxygenase Activation Protein Eta | 22                                     | 26       | 13      | 4       | 2          | 6.28300808           | 0.00004638 |
| 20 | VCL      | Vinculin                                                                   | 21                                     | 28       | 29      | 11      | 0          | 9.74435123           | 0.00056641 |
| 21 | TAGLN2   | Transgelin 2                                                               | 21                                     | 19       | 17      | 14      | 4          | 4.82059076           | 0.00001387 |
| 22 | PPFIA1   | PTPRF Interacting Protein Alpha 1                                          | 18                                     | 18       | 7       | 5       | 0          | 5.22812905           | 0.00004918 |
| 23 | AFDN     | Afadin                                                                     | 17                                     | 25       | 7       | 7       | 0          | 5.95618926           | 0.00013363 |
| 24 | SRC      | Non-Receptor Tyrosine Kinase                                               | 17                                     | 19       | 15      | 4       | 0          | 4.64962876           | 0.00003036 |
| 25 | SLC9A3R1 | SLC9A3 Regulator 1                                                         | 14                                     | 12       | 8       | 4       | 0          | 2.91138978           | 0.00000768 |
| 26 | CYFIP1   | Cytoplasmic FMR1 Interacting Protein 1                                     | 14                                     | 14       | 2       | 4       | 0          | 7.15807902           | 0.00093239 |
| 27 | SPTAN1   | Spectrin Alpha                                                             | 13                                     | 2        | 1       | 5       | 0          | 6.39940473           | 0.00072180 |
| 28 | YES1     | YES Proto-Oncogene 1                                                       | 12                                     | 13       | 8       | 3       | 0          | 4.94734176           | 0.00031723 |
| 29 | PPP2R1A  | Protein Phosphatase 2 Scaffold Subunit Aalpha                              | 12                                     | 12       | 4       | 5       | 0          | 5.09432794           | 0.00032760 |
| 30 | EH04     | EH Domain Containing 4                                                     | 10                                     | 9        | 10      | 3       | 0          | 5.06152621           | 0.00079280 |
| 31 | SPTBN1   | Spectrin Beta                                                              | 9                                      | 1        | 0       | 0       | 0          | 10.88467687          | 0.03740228 |
| 32 | PPP1CA   | Protein Phosphatase 1 Catalytic Subunit Alpha                              | 8                                      | 10       | 5       | 4       | 0          | 5.74041644           | 0.00649435 |
| 33 | LPP      | LIM Domain Containing Preferred Translocation Partner In Lipoma            | 7                                      | 7        | 0       | 0       | 0          | 2.30940108           | 0.00010037 |
| 34 | CSNK1D   | Casein Kinase 1 Delta                                                      | 7                                      | 7        | 0       | 0       | 0          | 2.47847880           | 0.00013266 |
| 35 | PLEKHAG  | Pleckstrin Homology Domain Containing A6                                   | 7                                      | 8        | 10      | 0       | 0          | 3.81725406           | 0.00116710 |
| 36 | TLDC1    | LysM-associated domain containing 1                                        | 6                                      | 10       | 4       | 2       | 0          | 1.67616342           | 0.00003452 |
| 37 | MAPK1    | Mitogen-Activated Protein Kinase 1                                         | 6                                      | 3        | 2       | 0       | 0          | 3.81725406           | 0.00372336 |
| 38 | S100A11  | S100 Calcium Binding Protein A11                                           | 6                                      | 6        | 4       | 3       | 4          | 1.27241802           | 0.00001245 |
| 39 | STAT3    | Signal Transducer And Activator Of Transcription 3                         | 6                                      | 6        | 3       | 0       | 0          | 3.95209408           | 0.00486935 |
| 40 | DSG2     | Desmoglein 2                                                               | 6                                      | 5        | 4       | 0       | 0          | 4.59813627           | 0.00614967 |
| 41 | RAP1A    | RAP1A                                                                      | 6                                      | 7        | 7       | 4       | 2          | 2.03540098           | 0.00013376 |
| 42 | UBASH3B  | Ubiquitin Associated And SH3 Domain Containing B                           | 6                                      | 11       | 5       | 0       | 0          | 4.52506248           | 0.00574050 |
| 43 | FAM110A  | Family With Sequence Similarity 110 Member A                               | 6                                      | 4        | 0       | 0       | 0          | 2.23606798           | 0.00019614 |
| 44 | CPNE3    | Copine 3                                                                   | 5                                      | 5        | 2       | 0       | 0          | 2.57275098           | 0.00070159 |
| 45 | LRRC1    | Leucine Rich Repeat Containing 1                                           | 5                                      | 5        | 2       | 0       | 0          | 2.99205297           | 0.00339240 |
| 46 | SEPTIN9  | Septin 9                                                                   | 5                                      | 0        | 0       | 0       | 0          | 3.38765265           | 0.00349303 |
| 47 | DLG1     | Discs Large MAGUK Scaffold Protein 1                                       | 5                                      | 5        | 3       | 0       | 0          | 3.65148372           | 0.00552972 |
| 48 | PSEN1    | Presenilin 1                                                               | 5                                      | 5        | 4       | 0       | 0          | 1.60356745           | 0.00006284 |
| 49 | PDLIM1   | PDZ And LIM Domain 1                                                       | 5                                      | 6        | 0       | 3       | 0          | 2.91138978           | 0.00170927 |
| 50 | CTTN     | Cortactin                                                                  | 4                                      | 4        | 2       | 0       | 0          | 2.54483604           | 0.00351881 |
| 51 | CAP1     | Cyclase Associated Actin Cytoskeleton Regulatory Protein 1                 | 4                                      | 0        | 0       | 0       | 0          | 3.40168026           | 0.00787071 |
| 52 | PKP3     | Plakophilin 3                                                              | 4                                      | 12       | 15      | 0       | 0          | 1.34518542           | 0.00009186 |
| 53 | DSTN     | Destrin                                                                    | 4                                      | 2        | 1       | 0       | 0          | 1.61834719           | 0.00017624 |
| 54 | VASP     | Vasodilator Stimulated Phosphoprotein                                      | 4                                      | 5        | 4       | 0       | 0          | 2.58198890           | 0.00318304 |
| 55 | PLEKHA4  | Pleckstrin Homology Domain Containing A4                                   | 4                                      | 10       | 6       | 4       | 0          | 2.88675135           | 0.00525169 |
| 56 | AP1B1    | Adaptor Related Protein Complex 1 Subunit Beta 1                           | 3                                      | 5        | 5       | 1       | 3          | 1.39727626           | 0.00139858 |
| 57 | PXN      | Paxillin                                                                   | 3                                      | 4        | 0       | 0       | 0          | 1.34518542           | 0.00067816 |
| 58 | PTK7     | Protein Tyrosine Kinase 7                                                  | 2                                      | 3        | 4       | 0       | 0          | 2.62769136           | 0.03049066 |
| 59 | S100A2   | S100 Calcium Binding Protein A2                                            | 2                                      | 1        | 1       | 0       | 0          | 1.61834719           | 0.00368203 |
|    |          | Core Components of Cadherin-Catenin Complex                                |                                        |          |         |         |            |                      |            |
|    |          | Lateral Membrane Receptors and their Adaptors                              |                                        |          |         |         |            |                      |            |
|    |          | Actin Cytoskeleton                                                         |                                        |          |         |         |            |                      |            |
|    |          | Signaling Intermediates                                                    |                                        |          |         |         |            |                      |            |
|    |          | Traffic                                                                    |                                        |          |         |         |            |                      |            |
|    |          | Others                                                                     |                                        |          |         |         |            |                      |            |

**Table S1**  
**Proteins identified in anti-GFP precipitates.**

## **Movie S1.**

**Dynamics of the mAb-bound E-cadherin clusters.** A431 cells expressing EcDn were briefly stained with the Alexa Fluor 594-conjugated 67A4 mAb and then immediately imaged simultaneously in green and red channels. Images were acquired at 10 sec intervals.
